# Supplementary material for: Identifying Schistosoma japonicum Excretory/Secretory Proteins and Their Interactions with Host Immune System
Source: PLoS One. 2011 Aug 24;6(8):e23786. doi: 10.1371/journal.pone.0023786 (PMC3161075; doi:10.1371/journal.pone.0023786)
Supplement: Table S4 — Detail comparison of immune peptides between SjSPs and SjBgPs. (XLS) [file pone.0023786.s004.xls]

## Sheet: Sheet1
Table S4
Detail comparison of immune peptides between SjSPs and SjBgPs
Features	t test ( SjSPs greater SjBgPs )	t test ( SjSPs less SjBgPs )	the percentage of SjSPs that have the feature	the percentage of SjBgPs that have the feature	the p-value of the enrichment of the proteins that have the feautre in SjSPs by hypergeometric test
linear B-cell peptides	1.00548e-12	1	1	0.98858	0
CTL epitopes	1.06733e-06	0.999999	0.982036	0.743754	0
MHCI weak binding peptides	0.00478276	0.995217	0.502994	0.424697	0.0120624
MHCI strong binding peptides	0.162637	0.837363	0.263473	0.226981	0.0985609
Human proteasome cleave sites	2.60268e-18	1	1	0.989293	0
MHCII weak binding peptides	1.90141e-16	1	1	0.985011	0
MHCII strong binding peptides	1.76427e-12	1	1	0.977873	0
