# Supplementary material for: Identifying Schistosoma japonicum Excretory/Secretory Proteins and Their Interactions with Host Immune System
Source: PLoS One. 2011 Aug 24;6(8):e23786. doi: 10.1371/journal.pone.0023786 (PMC3161075; doi:10.1371/journal.pone.0023786)
Supplement: Table S6 — Domains significantly enriched in SjSPs against SjBgPs by hypergeometric test. (XLS) [file pone.0023786.s006.xls]

## Sheet: Sheet1
Table S6
Domains significantly enriched in SjSPs against SjBgPs by hypergeometric test.
Domain ID	Domain Short Name	Domain Name	P value
IPR000169	Pept_cys_AS	Peptidase, cysteine peptidase active site	0
IPR001023	Hsp70	Heat shock protein Hsp70	0
IPR001236	Lactate/malate_DH_N	Lactate/malate dehydrogenase, N-terminal	0
IPR001372	Dynein_light_chain_typ-1/2	Dynein light chain, type 1/2	0
IPR001557	L-lactate/malate_DH	L-lactate/malate dehydrogenase	0
IPR001715	CH-domain	Calponin homology domain	0
IPR002017	Spectrin_repeat	Spectrin repeat	0
IPR002715	Nas_poly-pep-assoc_cplx	Nascent polypeptide-associated complex NAC	0
IPR004088	KH_type_1	K Homology, type 1	0
IPR009000	Transl_elong_init/rib_B-barrel	Translation elongation/initiation factor/Ribosomal, beta-barrel	0
IPR013126	Hsp_70	Heat shock protein 70	0
IPR015424	PyrdxlP-dep_Trfase_major_dom	Pyridoxal phosphate-dependent transferase, major domain	0
IPR015955	Lactate_DH/Glyco_Ohase_4_C	Lactate dehydrogenase/glycoside hydrolase, family 4, C-terminal	0
IPR017853	Glycoside_hydrolase_SF	Glycoside hydrolase, superfamily	0
IPR018111	KH_type_1_subgr	K Homology, type 1, subgroup	0
IPR018159	Spectrin/alpha-actinin	Spectrin/alpha-actinin	0
IPR018181	Heat_shock_70_CS	Heat shock protein 70, conserved site	0
IPR022383	Lactate/malate_DH_C	Lactate/malate dehydrogenase, C-terminal	0
IPR022967	RNA-binding_domain_S1	RNA-binding domain, S1	0
IPR023214	HAD-like_dom	HAD-like domain	0
IPR000504	RRM_dom	RNA recognition motif domain	6.02063e-05
IPR002048	EF_hand_Ca-bd	Calcium-binding EF-hand	0.000123661
IPR001107	Band_7	Band 7 protein	0.00166696
IPR003593	ATPase_AAA+_core	ATPase, AAA+ type, core	0.00166696
IPR003959	ATPase_AAA_core	ATPase, AAA-type, core	0.00166696
IPR004087	KH	K Homology	0.00166696
IPR017936	Thioredoxin-like	Thioredoxin-like	0.00166696
IPR018249	EF_HAND_2	EF-HAND 2	0.00191708
IPR012336	Thioredoxin-like_fold	Thioredoxin-like fold	0.00346719
IPR018247	EF_Hand_1_Ca_BS	EF-Hand 1, calcium-binding site	0.00346719
IPR018248	EF-hand	EF-hand	0.00510694
